# Supplementary material for: Performance Analysis of Optically Pumped 4He Magnetometers vs. Conventional SQUIDs: From Adult to Infant Head Models
Source: MDPI journal article supplement (doi:10.3390/s22083093), 2022-04-18

# Supplementary material

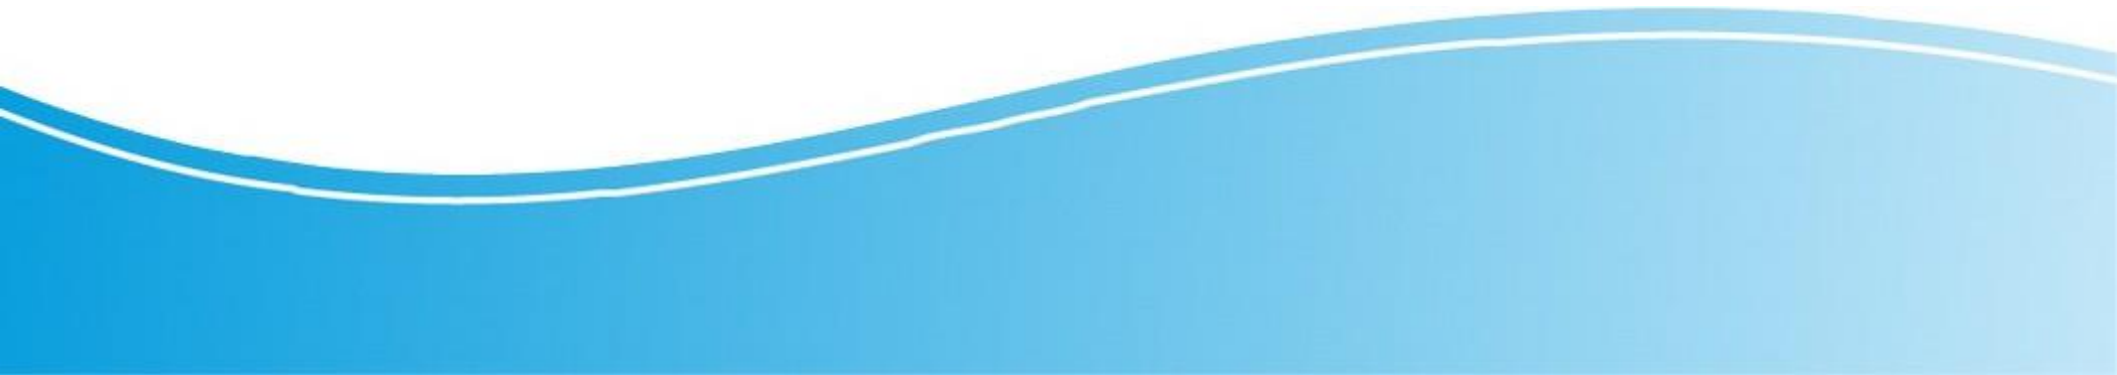

# **Topography power**

# Topography power - Adult

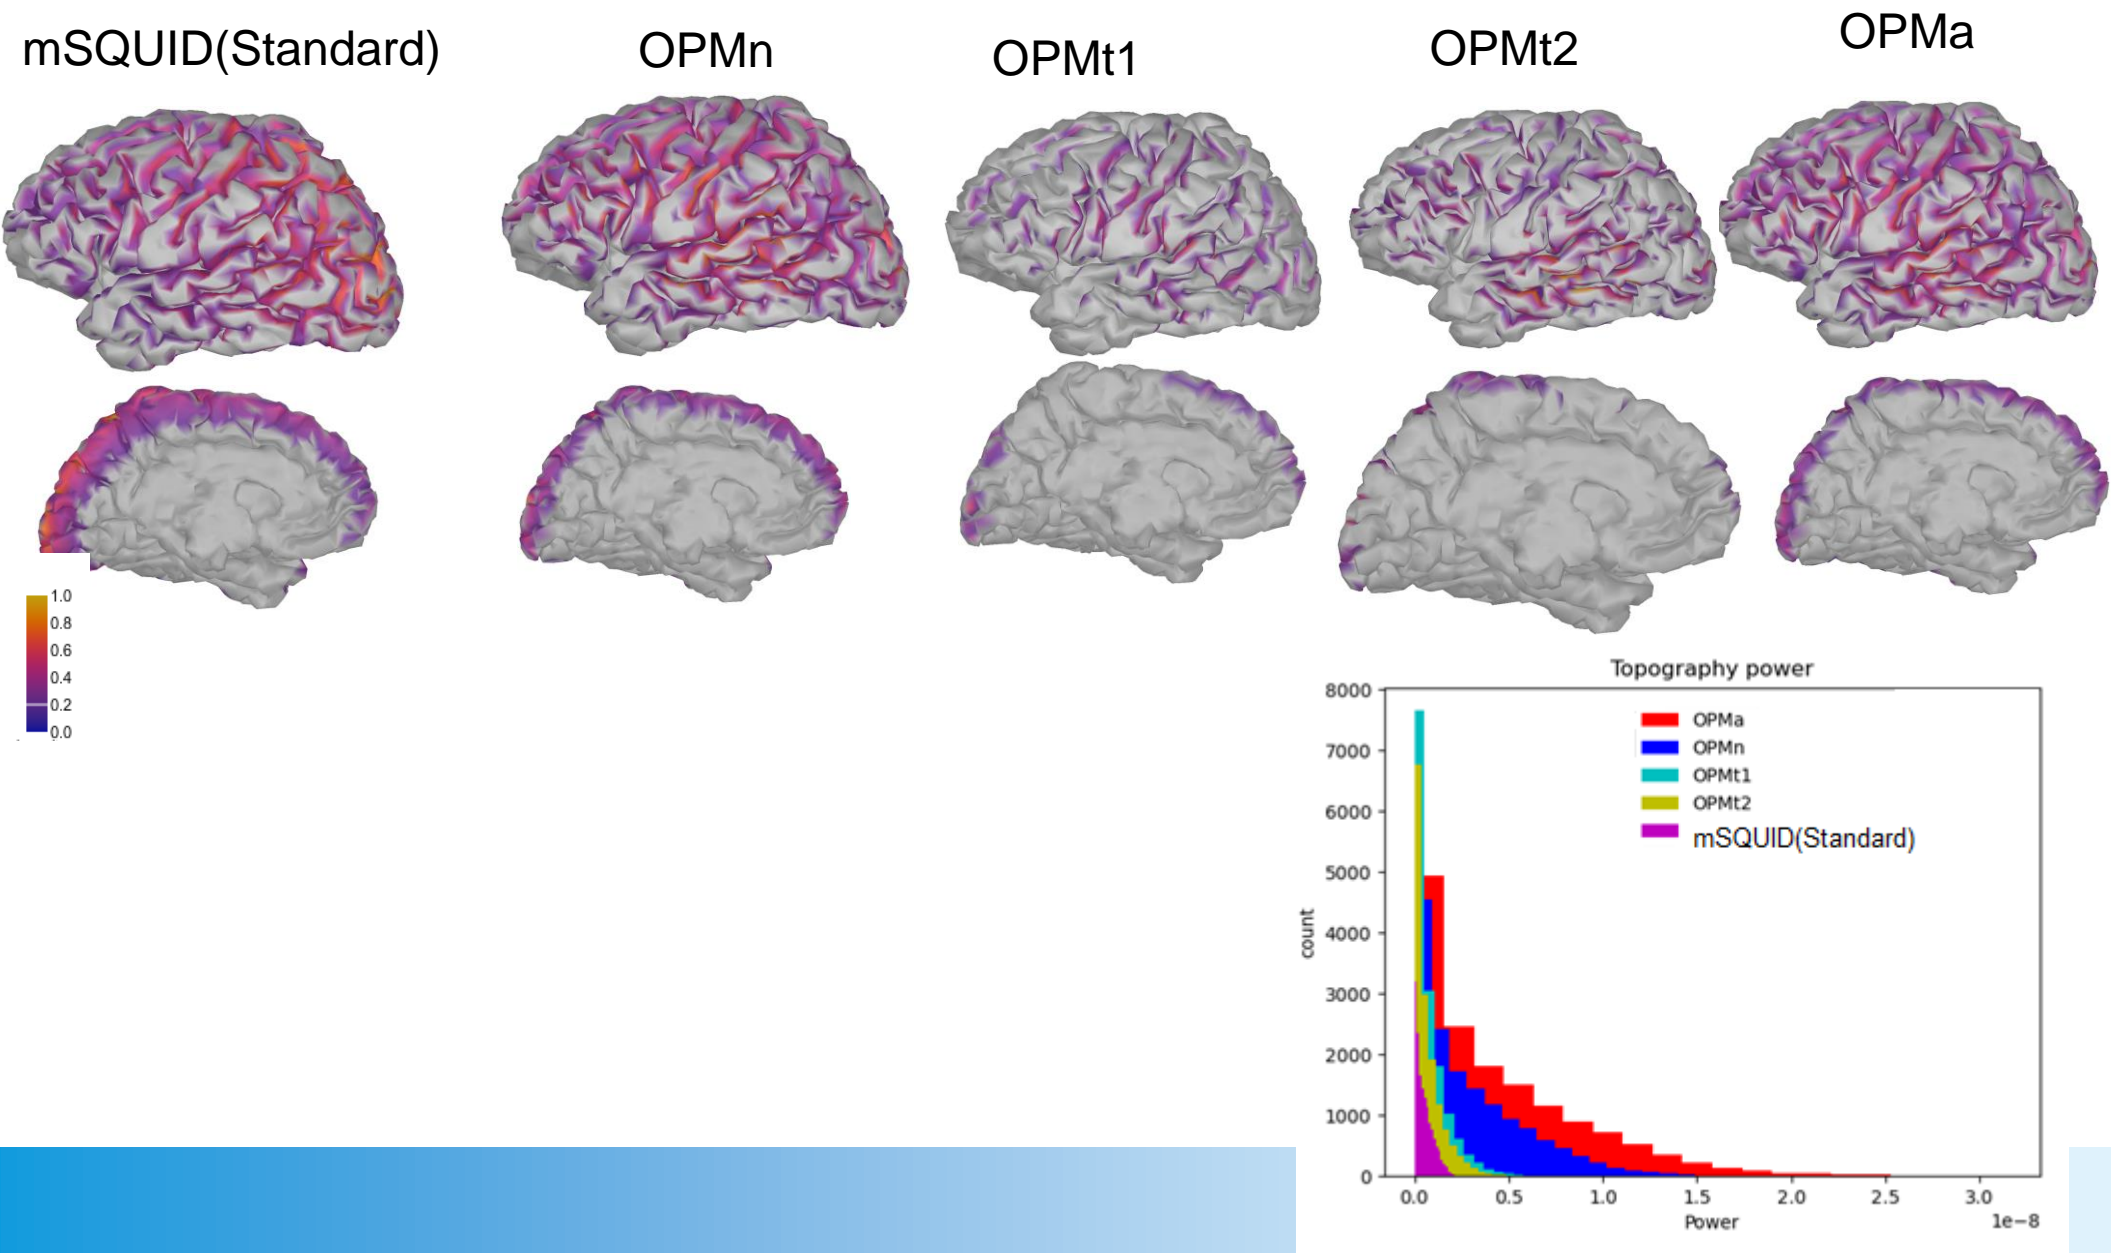

# Topography power - 1years

MEG

MEGz

OPMn

OPMt1

OPMt2

OPMa

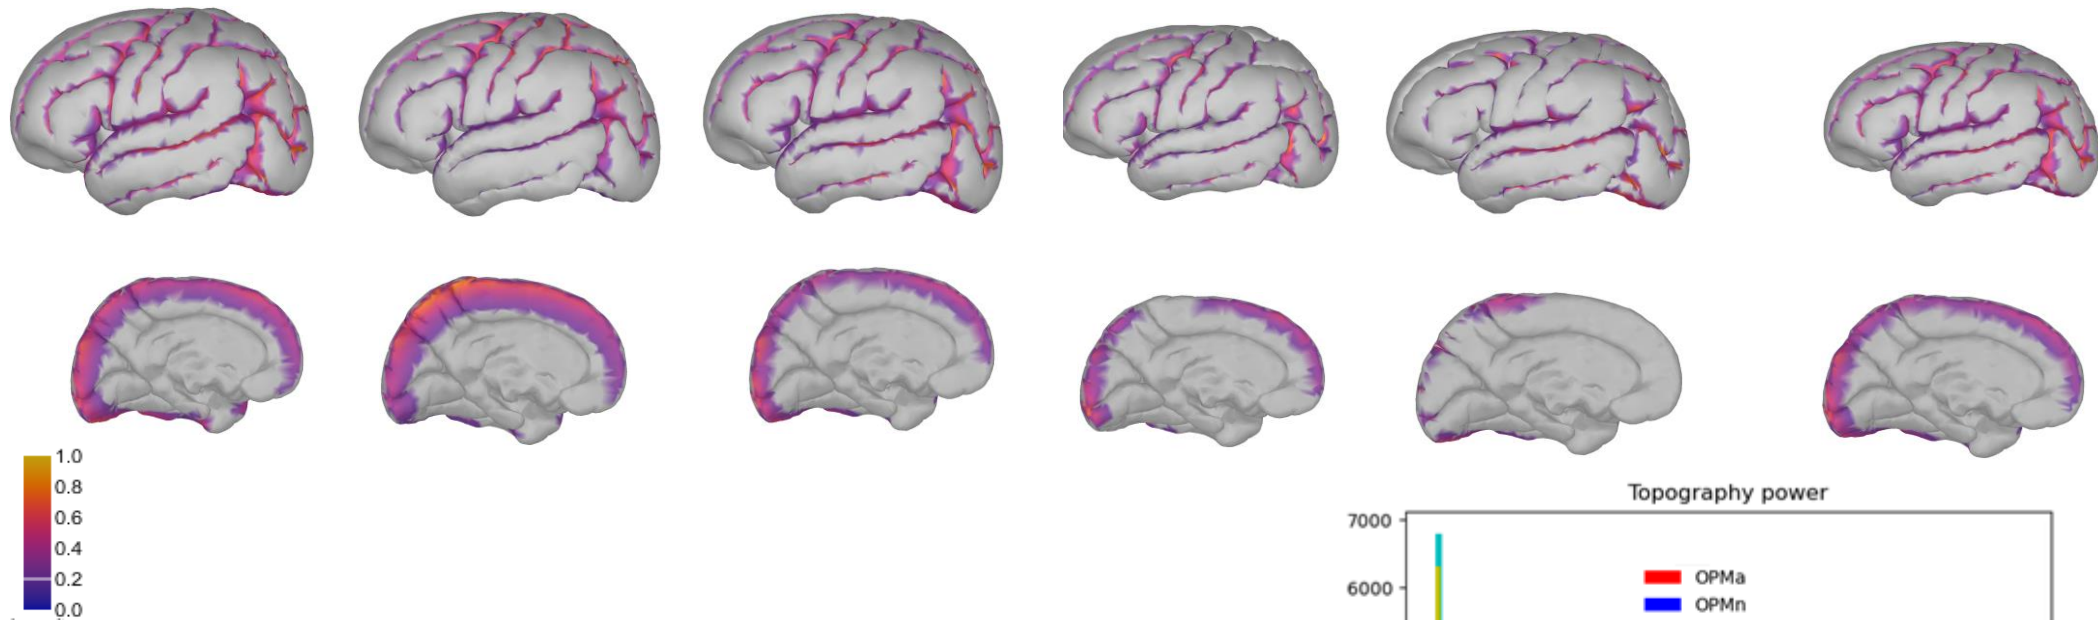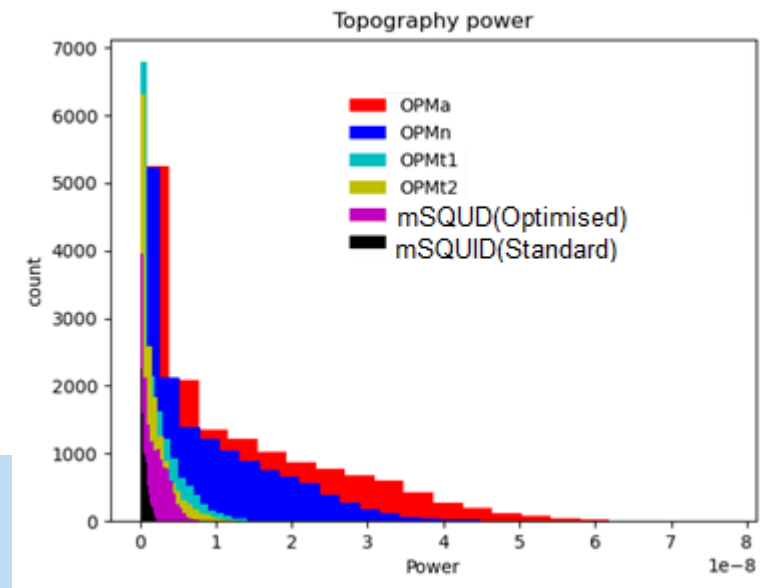

# **Sensitivity map**

# Distribution of the sensitivity to three orthogonal source components - Adult

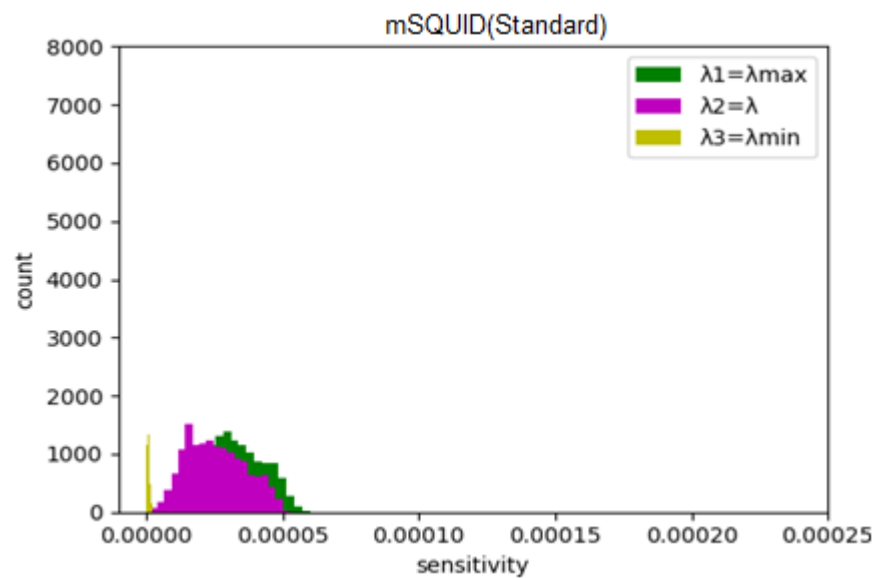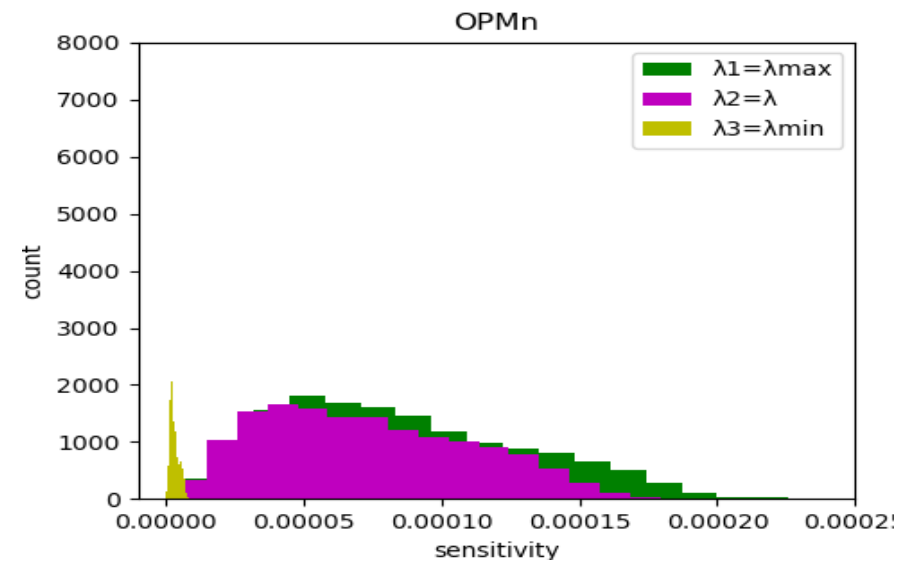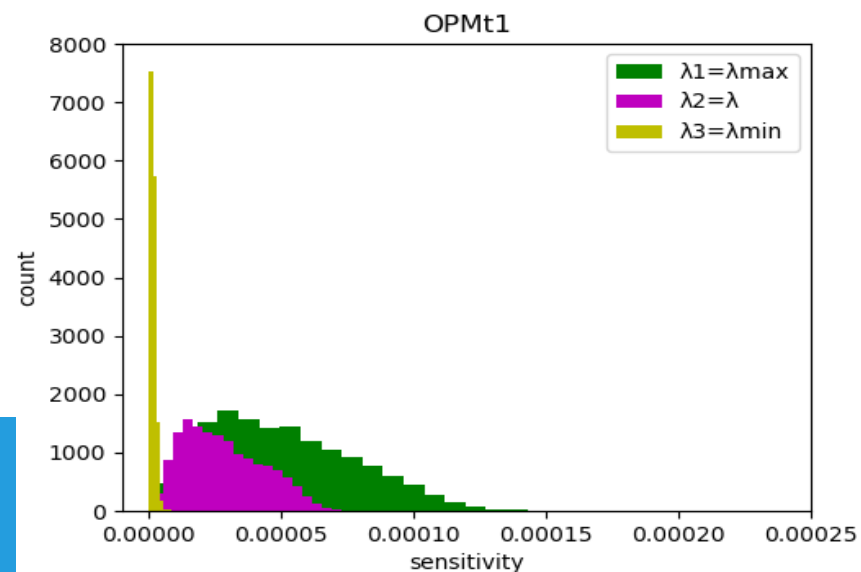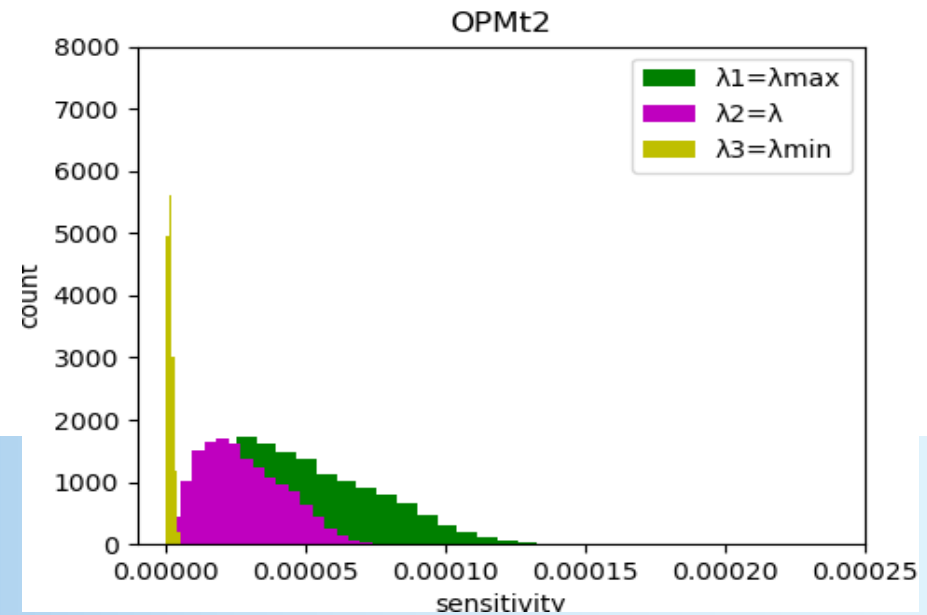

## Sensors model – 24 months

mSQUID(Standard)

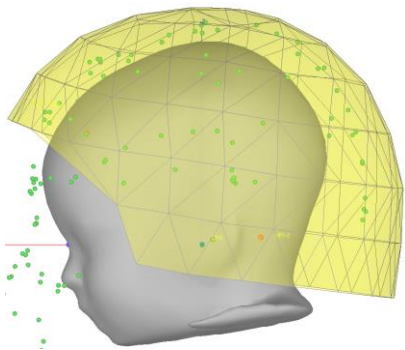

mSQUID(Optimized)

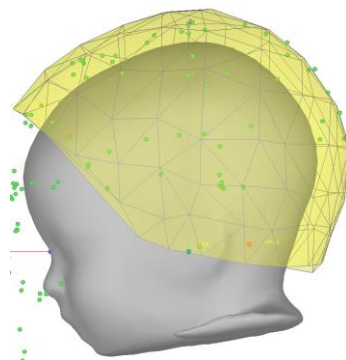

OPM

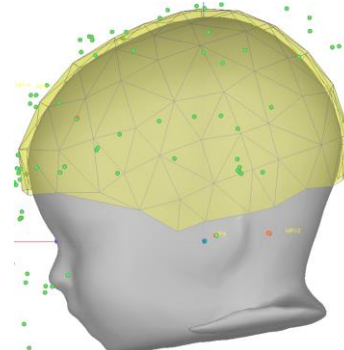

## Distribution of the sensitivity to three orthogonal source components – 24 months

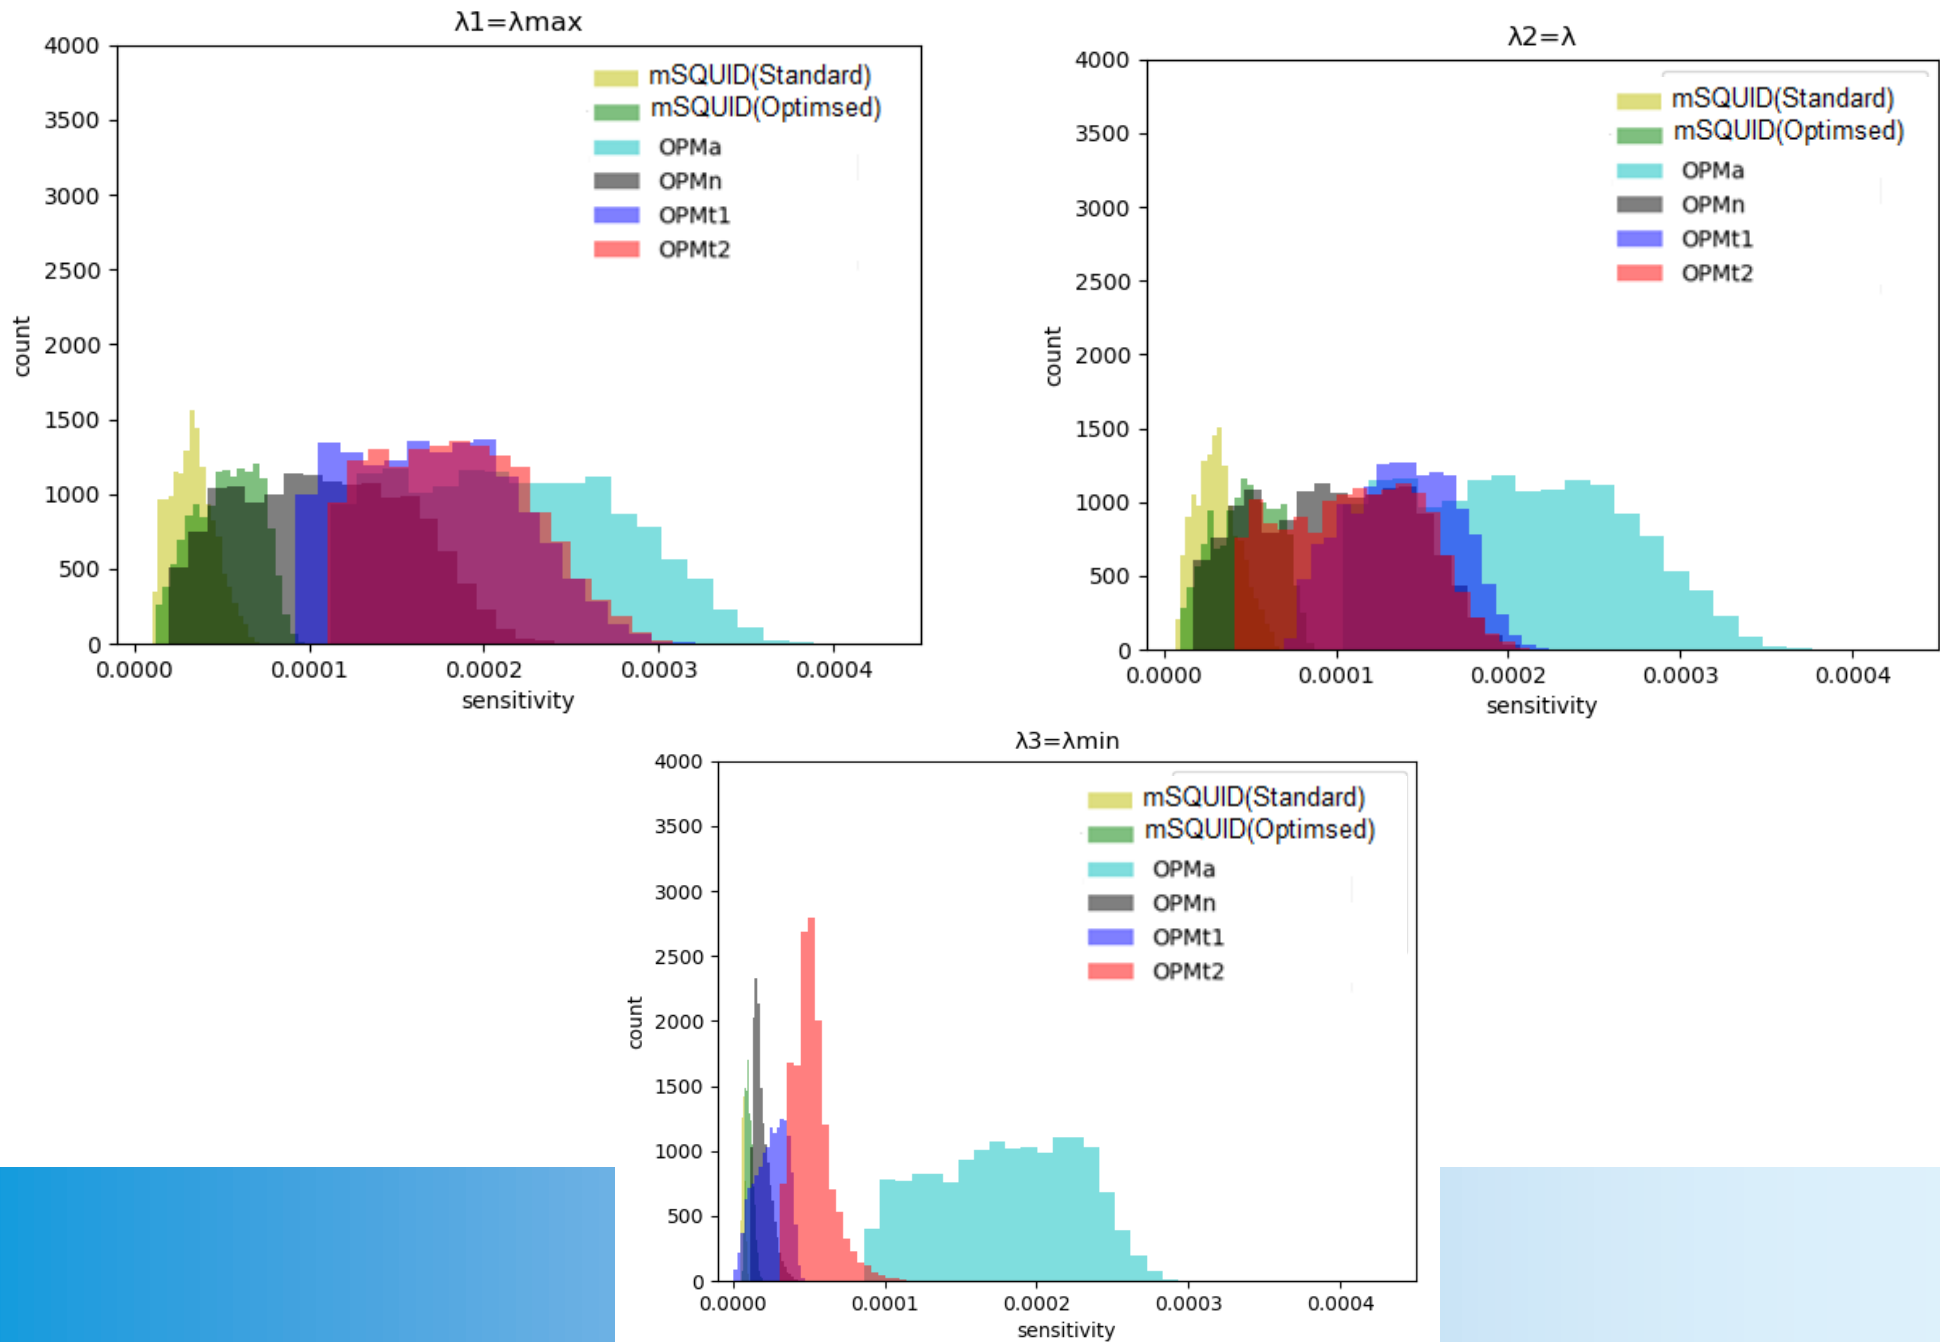



# Sensors model – 18 months

mSQUID(Standard)

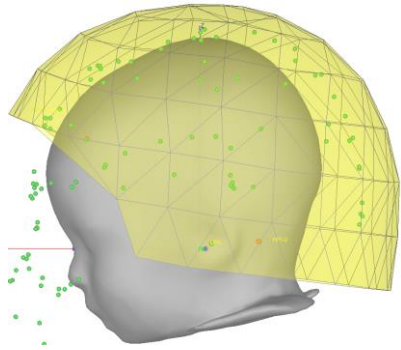

mSQUID(Optimized)

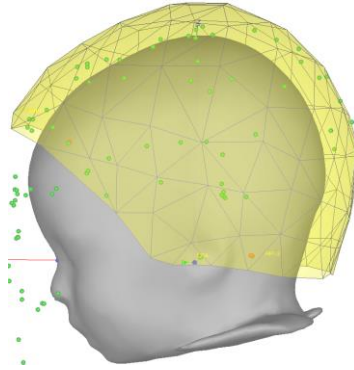

OPM

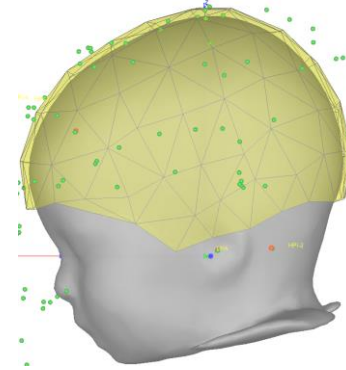

# Distribution of the sensitivity to three orthogonal source components – 18 months

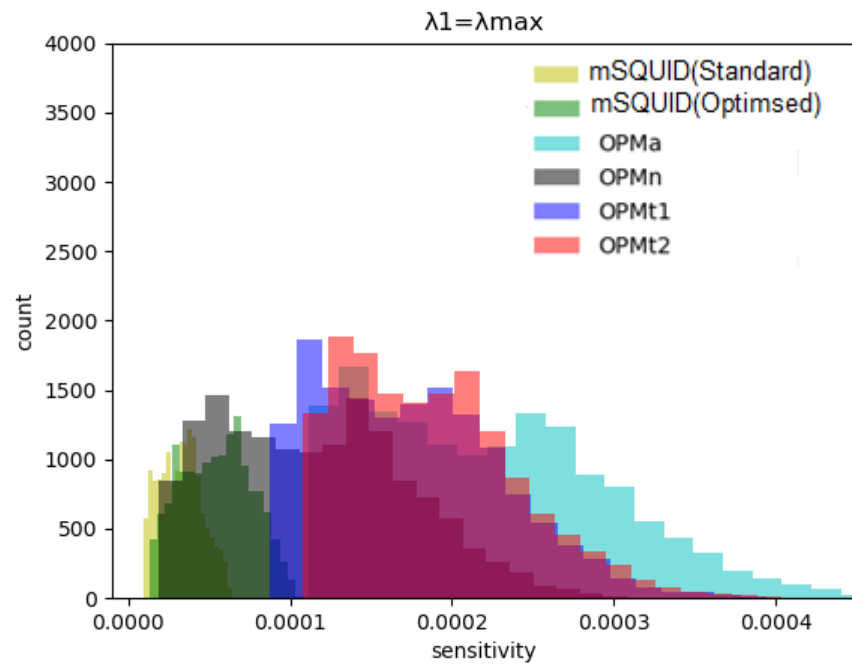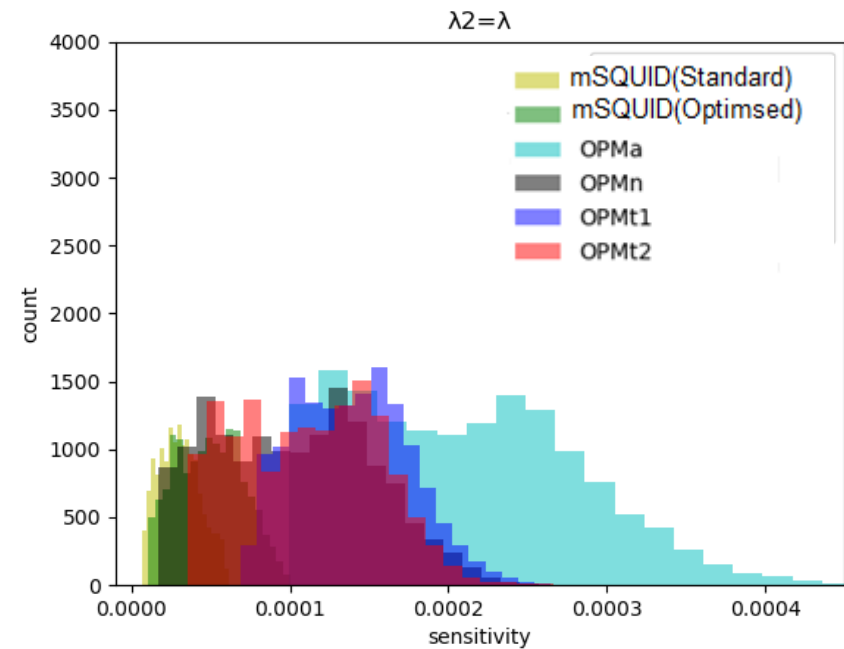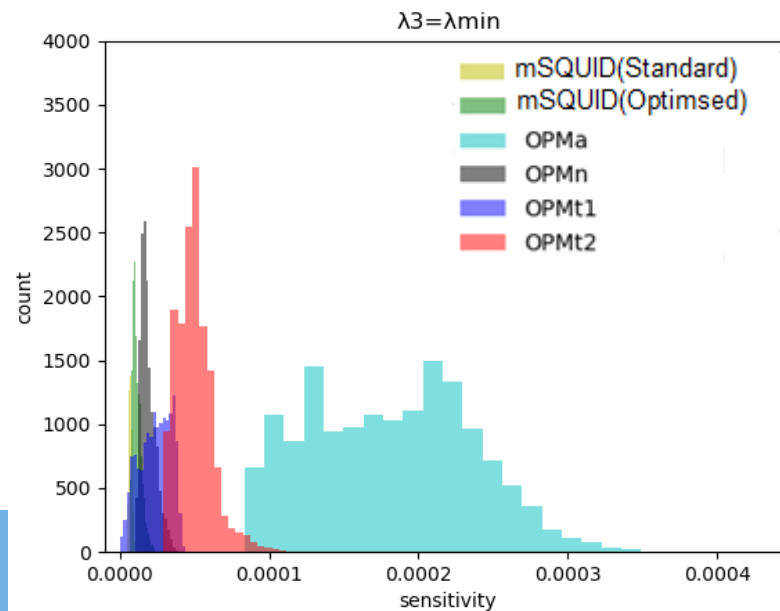

# Sensors model – 0.5 months

0,5 months

mSQUID(Standard)

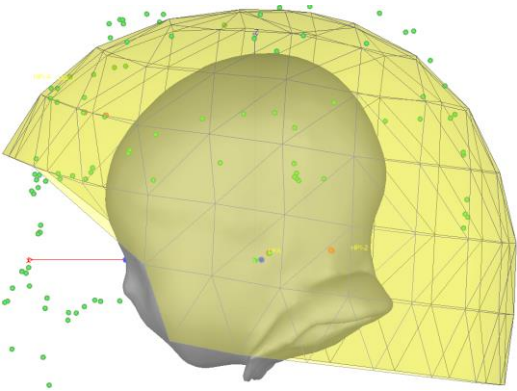

mSQUID(Optimized)

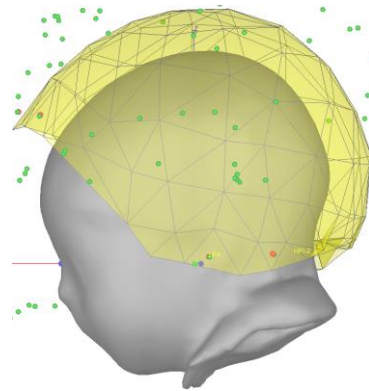

OPM

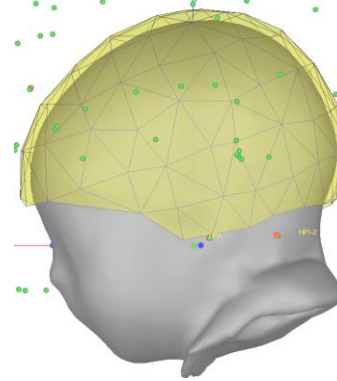

## Distribution of the sensitivity to three orthogonal source components – 0.5 months

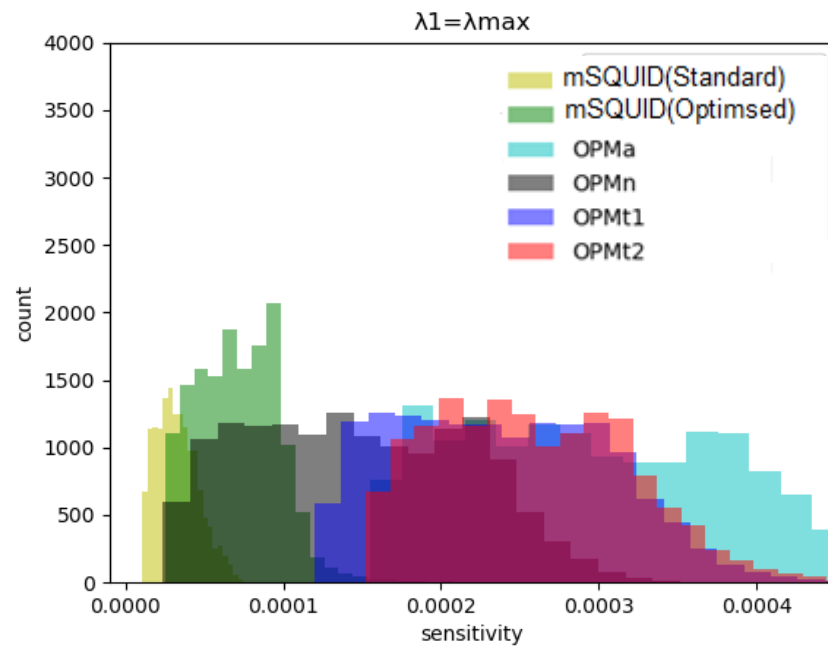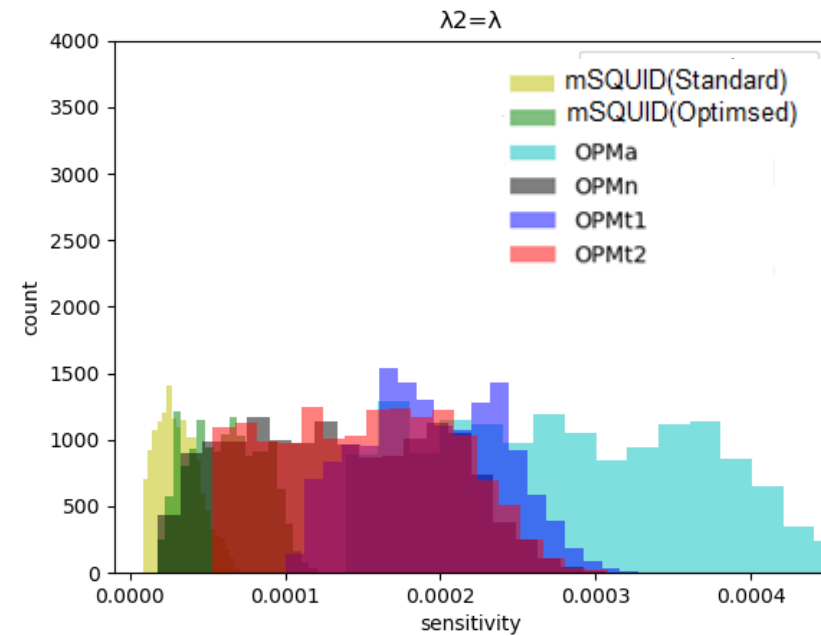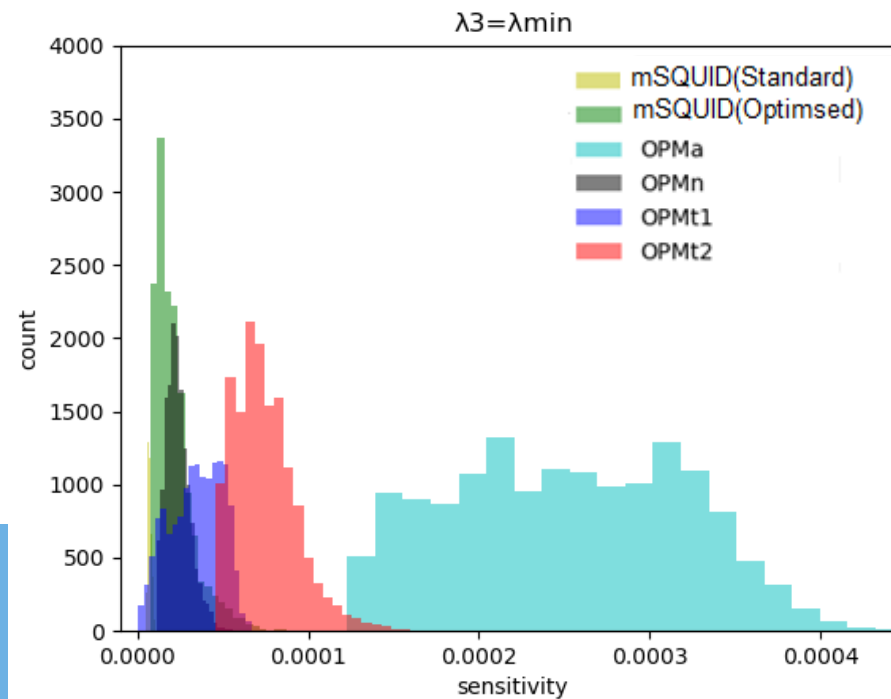

# **Analysis of Variance (ANOVA)**

## Topography power (OPMa-mSQUID(Optimized))

| ANOVA Table |             |        |             |        |        |
|-------------|-------------|--------|-------------|--------|--------|
| Source      | SS          | df     | MS          | F      | Prob>F |
| Columns     | 1.07613e-12 | 12     | 8.96779e-14 | 654.22 | 0      |
| Error       | 2.67315e-11 | 195013 | 1.37075e-16 |        |        |
| Total       | 2.78076e-11 | 195025 |             |        |        |

## Multi compare

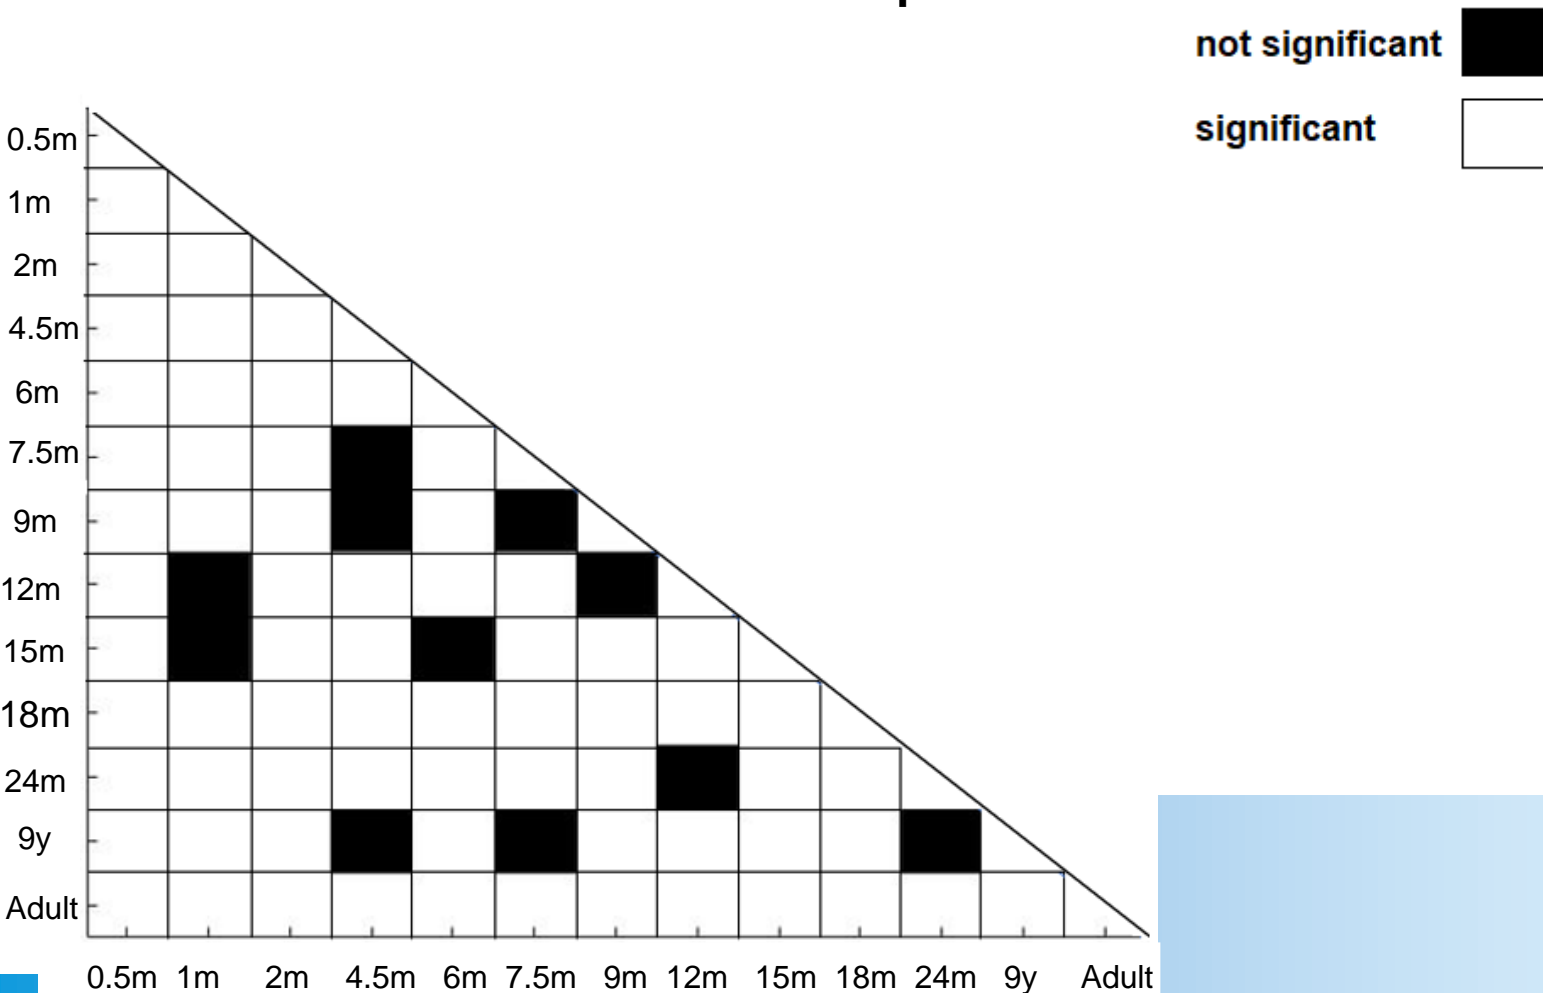

## Topography power (OPMa-mSQUID(Standard))

| ANOVA Table |             |        |             |        |        |
|-------------|-------------|--------|-------------|--------|--------|
| Source      | SS          | df     | MS          | F      | Prob>F |
| Columns     | 1.48412e-12 | 12     | 1.23677e-13 | 749.35 | 0      |
| Error       | 3.21859e-11 | 195013 | 1.65045e-16 |        |        |
| Total       | 3.36701e-11 | 195025 |             |        |        |

## Multi compare

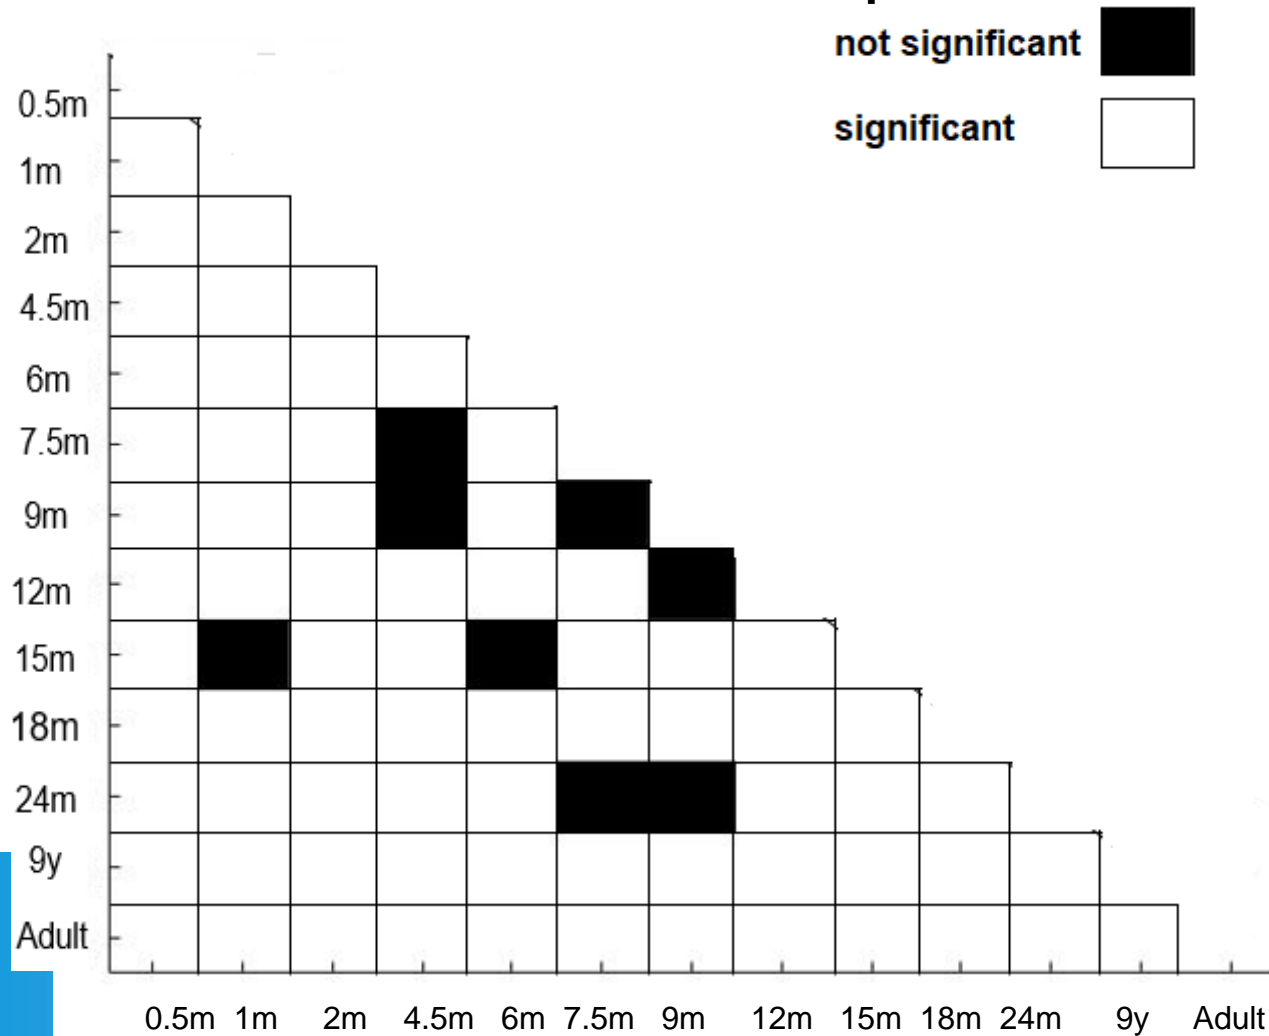

## Sensitivity map (OPMa-mSQUID (Optimized))

| ANOVA Table |         |        |             |         |        |
|-------------|---------|--------|-------------|---------|--------|
| Source      | SS      | df     | MS          | F       | Prob>F |
| Columns     | 0.00003 | 12     | 2.71905e-06 | 1008.87 | 0      |
| Error       | 0.00053 | 195013 | 2.69515e-09 |         |        |
| Total       | 0.00056 | 195025 |             |         |        |

## Multi compare

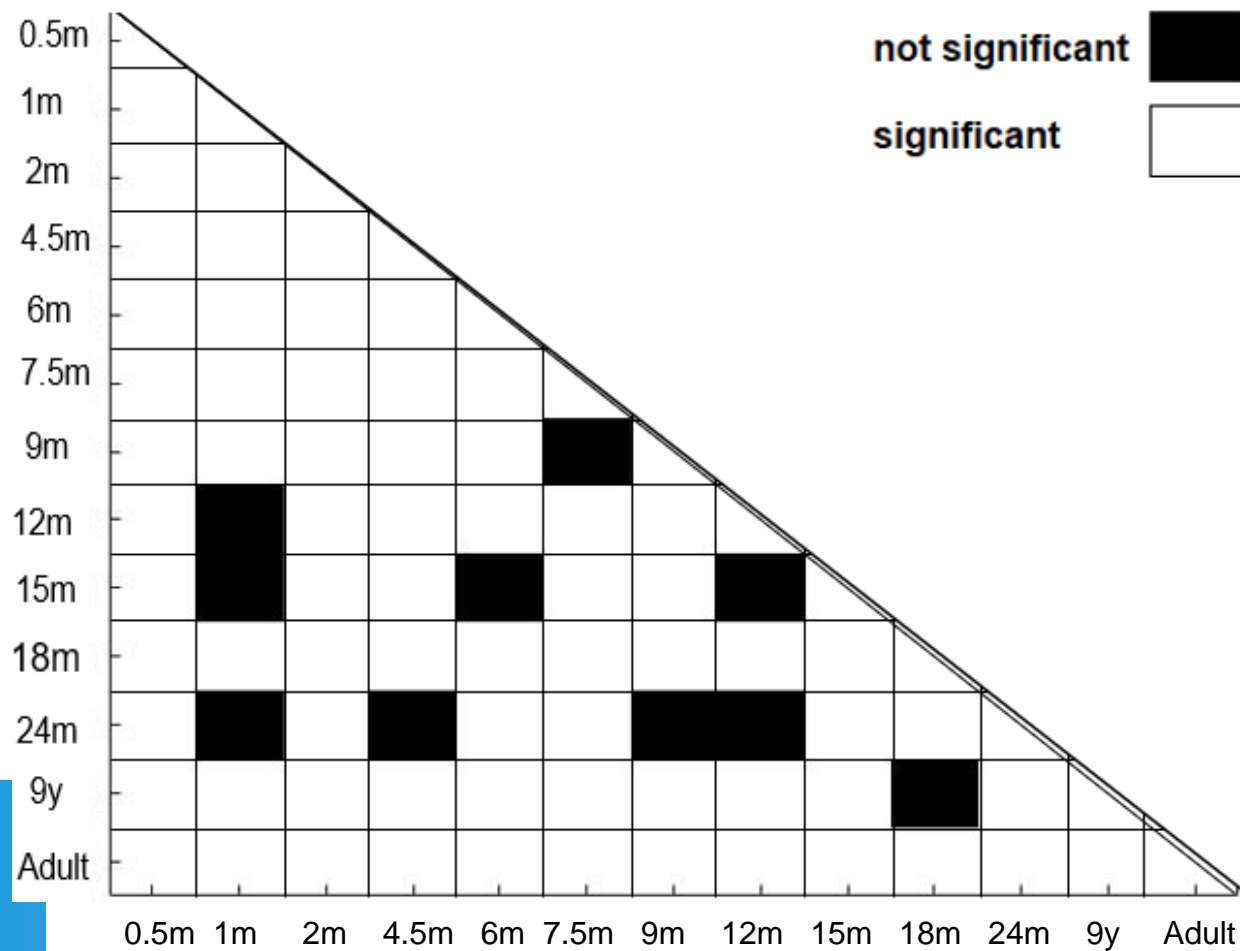



## Sensitivity map (OPMa-mSQUID (Optimized))

### Lambda\_min

ANOVA Table

| Source  | SS          | df     | MS          | F       | Prob>F |
|---------|-------------|--------|-------------|---------|--------|
| Columns | 2.24672e-07 | 12     | 1.87227e-08 | 2138.69 | 0      |
| Error   | 1.70719e-06 | 195013 | 8.75426e-12 |         |        |
| Total   | 1.93187e-06 | 195025 |             |         |        |

### Multi compare

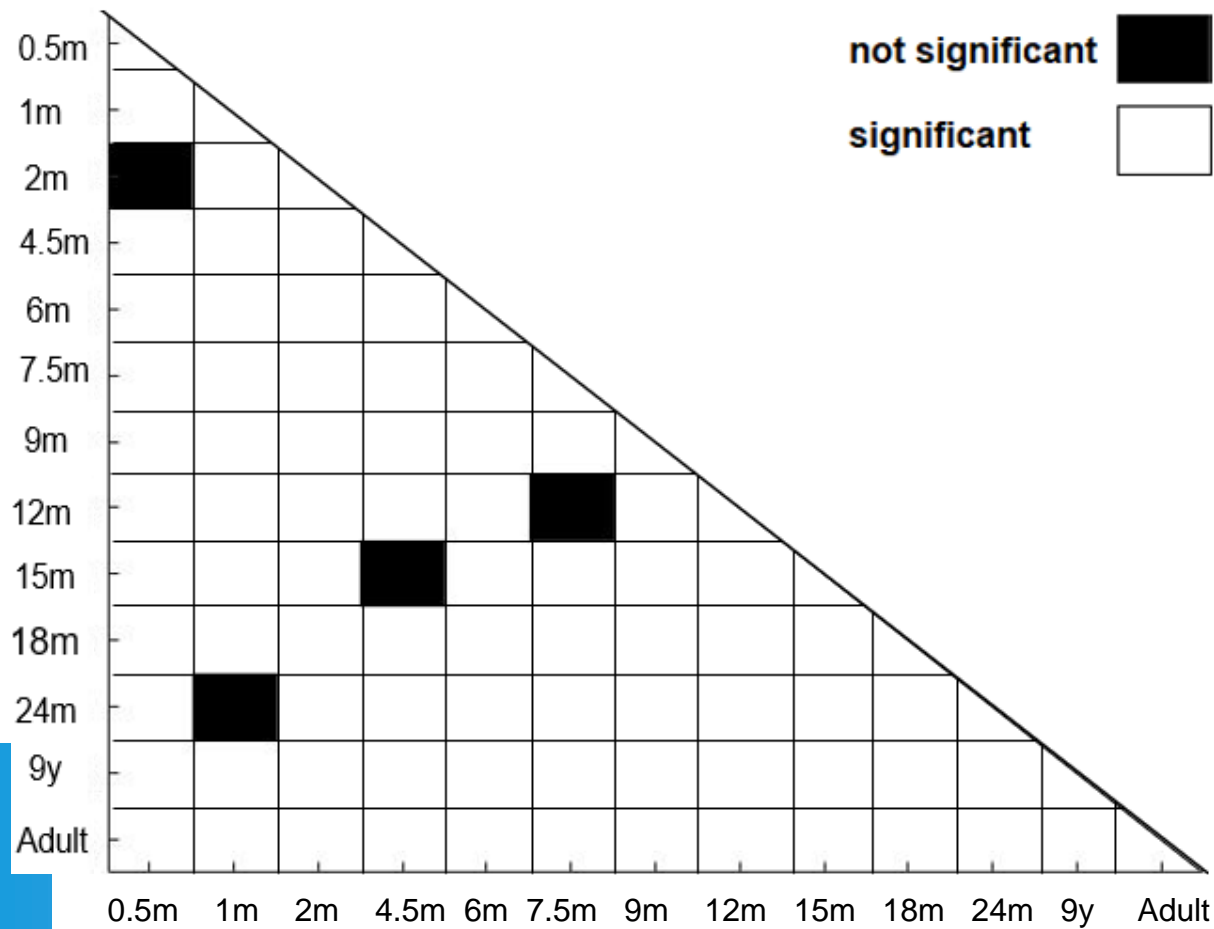

# Sensitivity map (OPMa-mSQUID (Standard))

## Lambda\_max

| ANOVA Table |         |        |             |         |        |
|-------------|---------|--------|-------------|---------|--------|
| Source      | SS      | df     | MS          | F       | Prob>F |
| Columns     | 0.0001  | 12     | 8.15775e-06 | 2003.32 | 0      |
| Error       | 0.00079 | 195013 | 4.07211e-09 |         |        |
| Total       | 0.00089 | 195025 |             |         |        |

## Multi compare

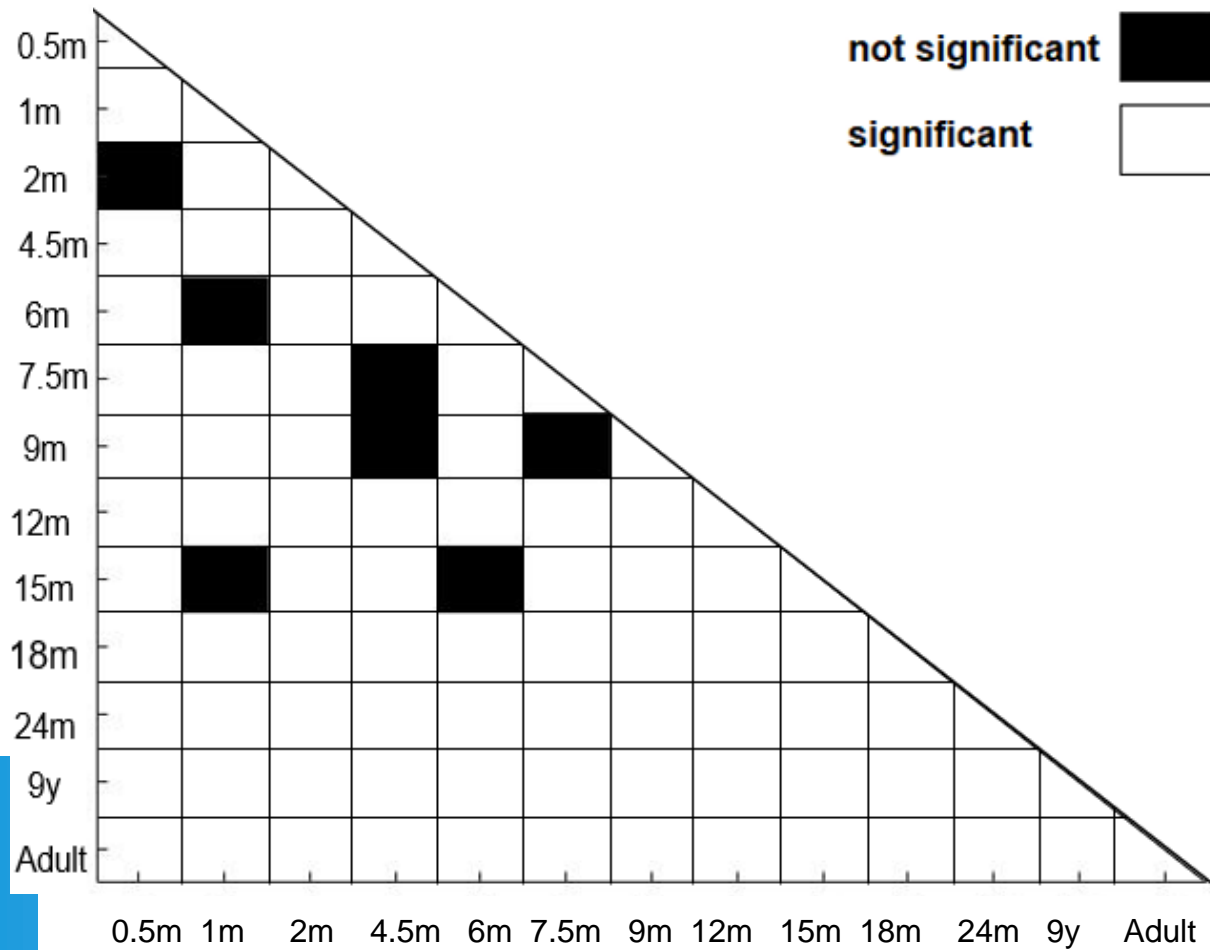

## Sensitivity map (OPMa-mSQUID (Standard))

| ANOVA Table |             |        |             |         |        |
|-------------|-------------|--------|-------------|---------|--------|
| Source      | SS          | df     | MS          | F       | Prob>F |
| Columns     | 4.29405e-07 | 12     | 3.57838e-08 | 3196.61 | 0      |
| Error       | 2.18303e-06 | 195013 | 1.11943e-11 |         |        |
| Total       | 2.61244e-06 | 195025 |             |         |        |

## Multi compare

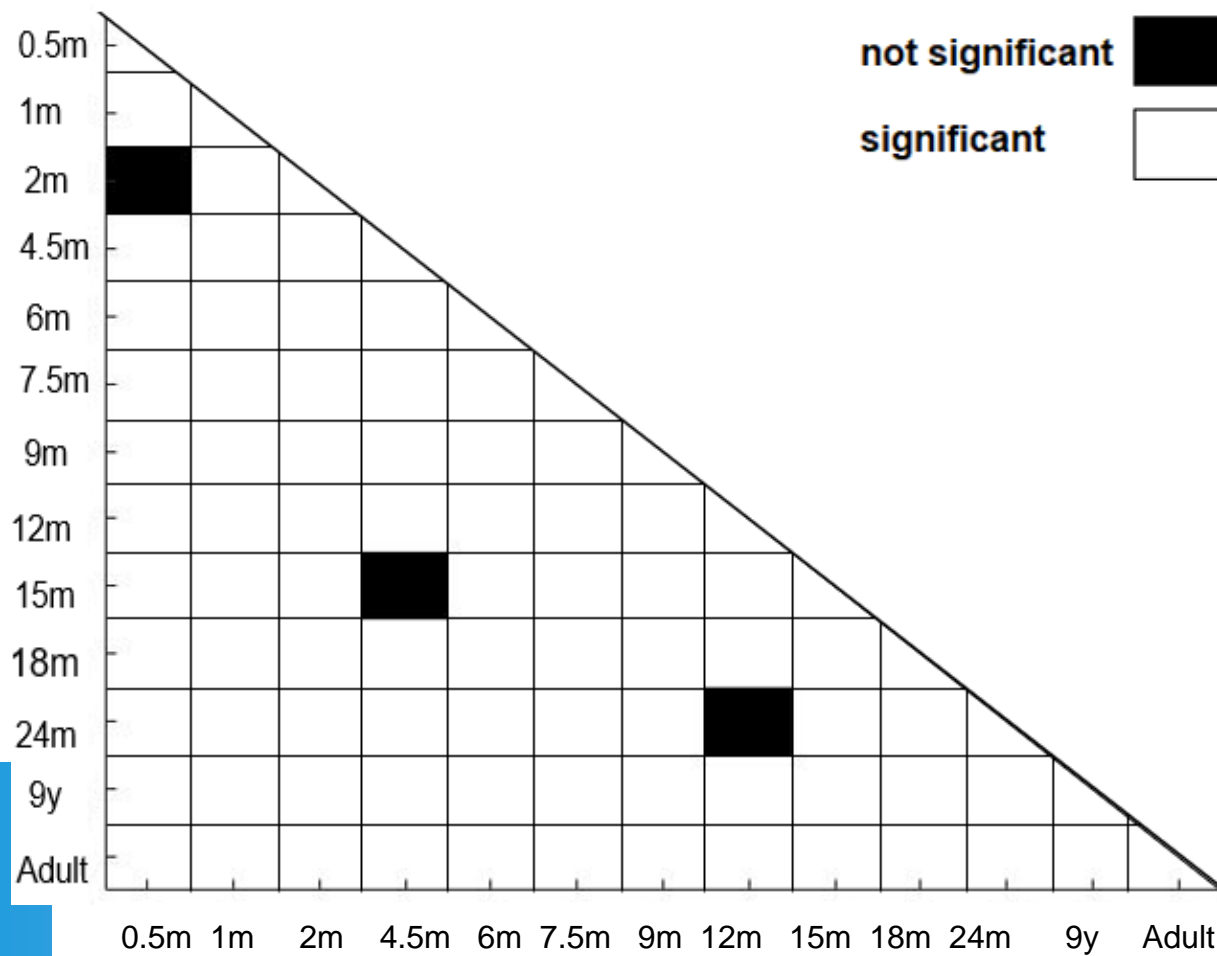

## PV (OPMa-mSQUID(Optimized))

| Source  | SS       | df     | MS     | F      | Prob>F |
|---------|----------|--------|--------|--------|--------|
| Columns | 9540.8   | 12     | 795.07 | 399.56 | 0      |
| Error   | 388048.4 | 195013 | 1.99   |        |        |
| Total   | 397589.2 | 195025 |        |        |        |

## Multi compare

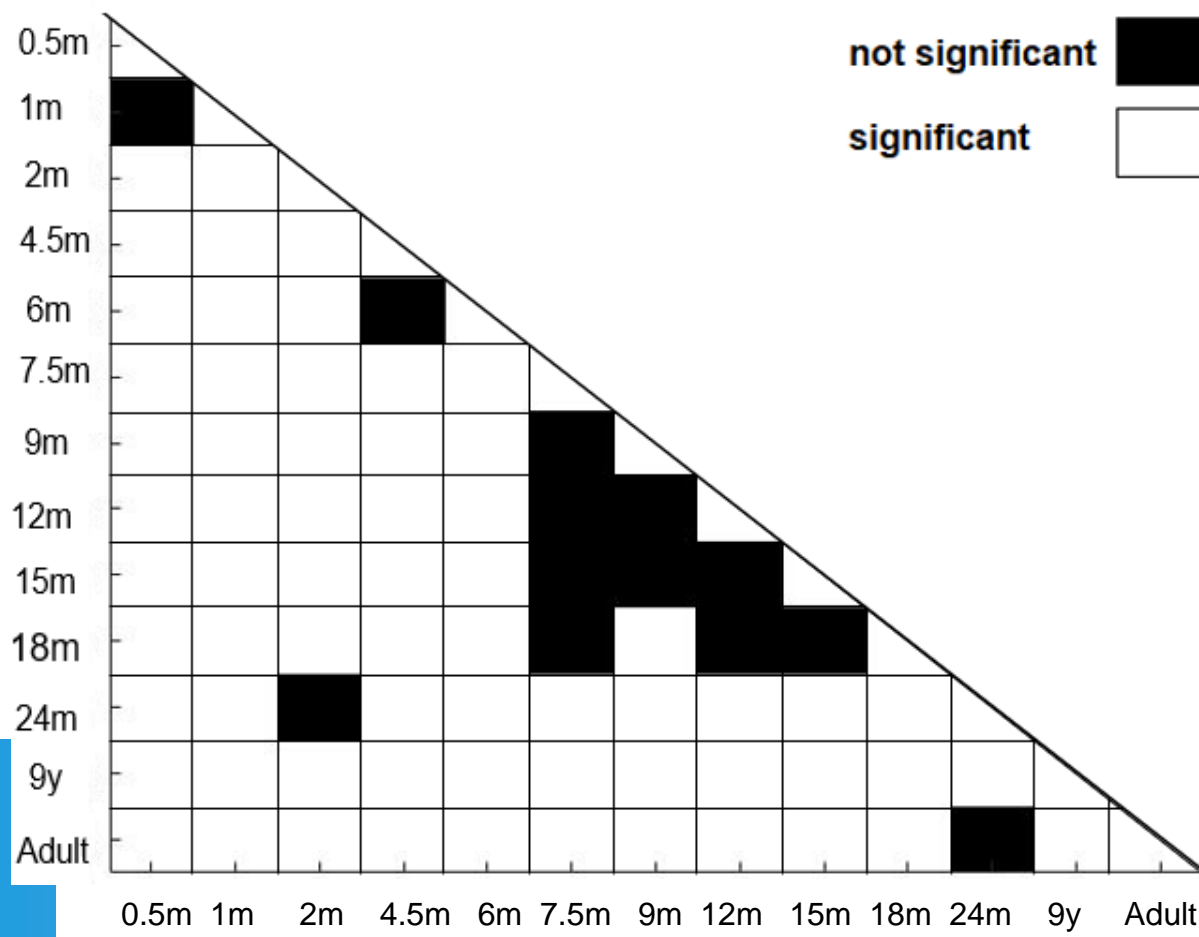

## PV (OPMa-mSQUID (Standard))

| ANOVA Table |          |        |         |         |        |
|-------------|----------|--------|---------|---------|--------|
| Source      | SS       | df     | MS      | F       | Prob>F |
| Columns     | 12345    | 12     | 1028.75 | 2104.76 | 0      |
| Error       | 95317.4  | 195013 | 0.49    |         |        |
| Total       | 107662.4 | 195025 |         |         |        |

## Multi compare

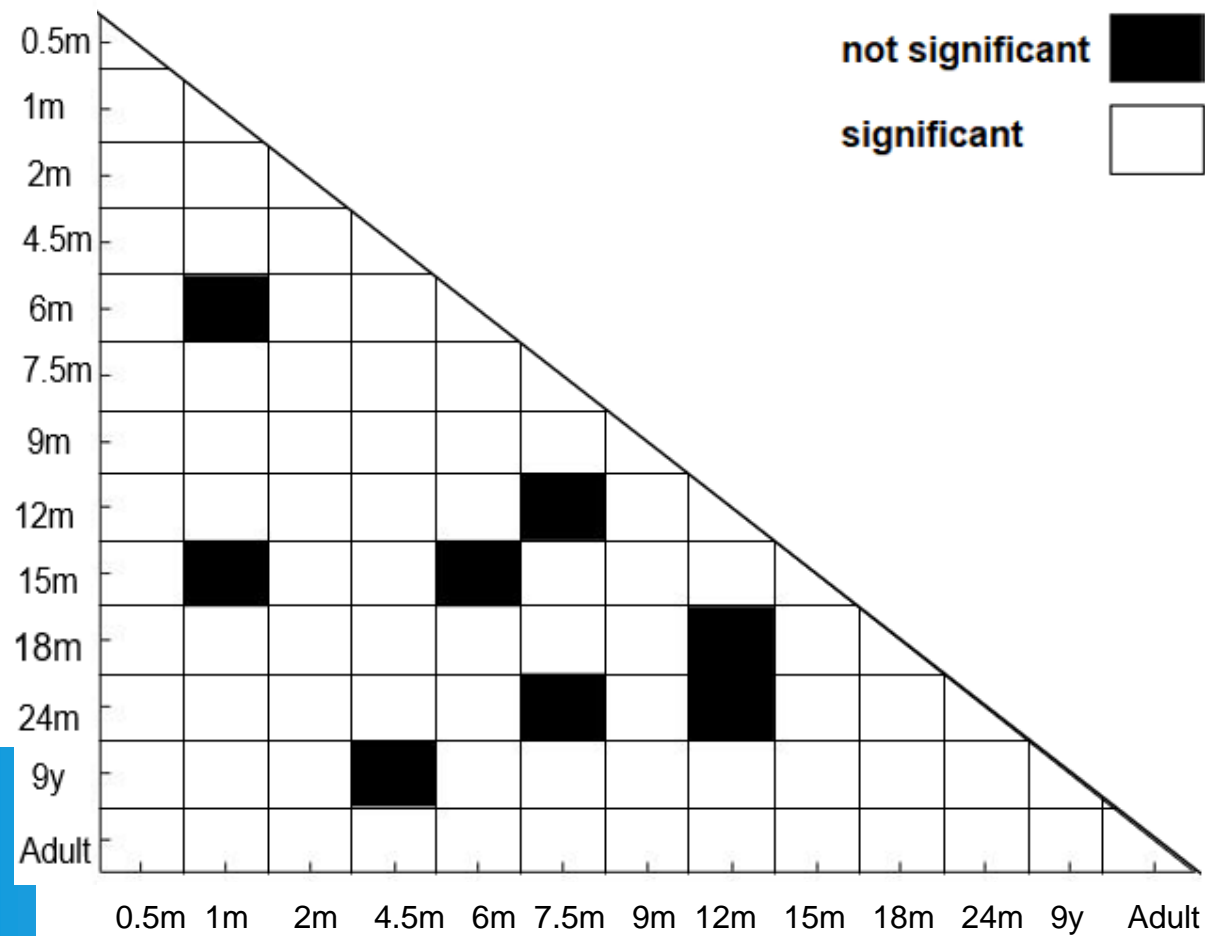

# TP (OPMa-mSQUID(Optimized))

| ANOVA Table |         |        |         |        |        |
|-------------|---------|--------|---------|--------|--------|
| Source      | SS      | df     | MS      | F      | Prob>F |
| Columns     | 109.05  | 12     | 9.08766 | 180.55 | 0      |
| Error       | 9815.51 | 195013 | 0.05033 |        |        |
| Total       | 9924.56 | 195025 |         |        |        |

## Multi compare

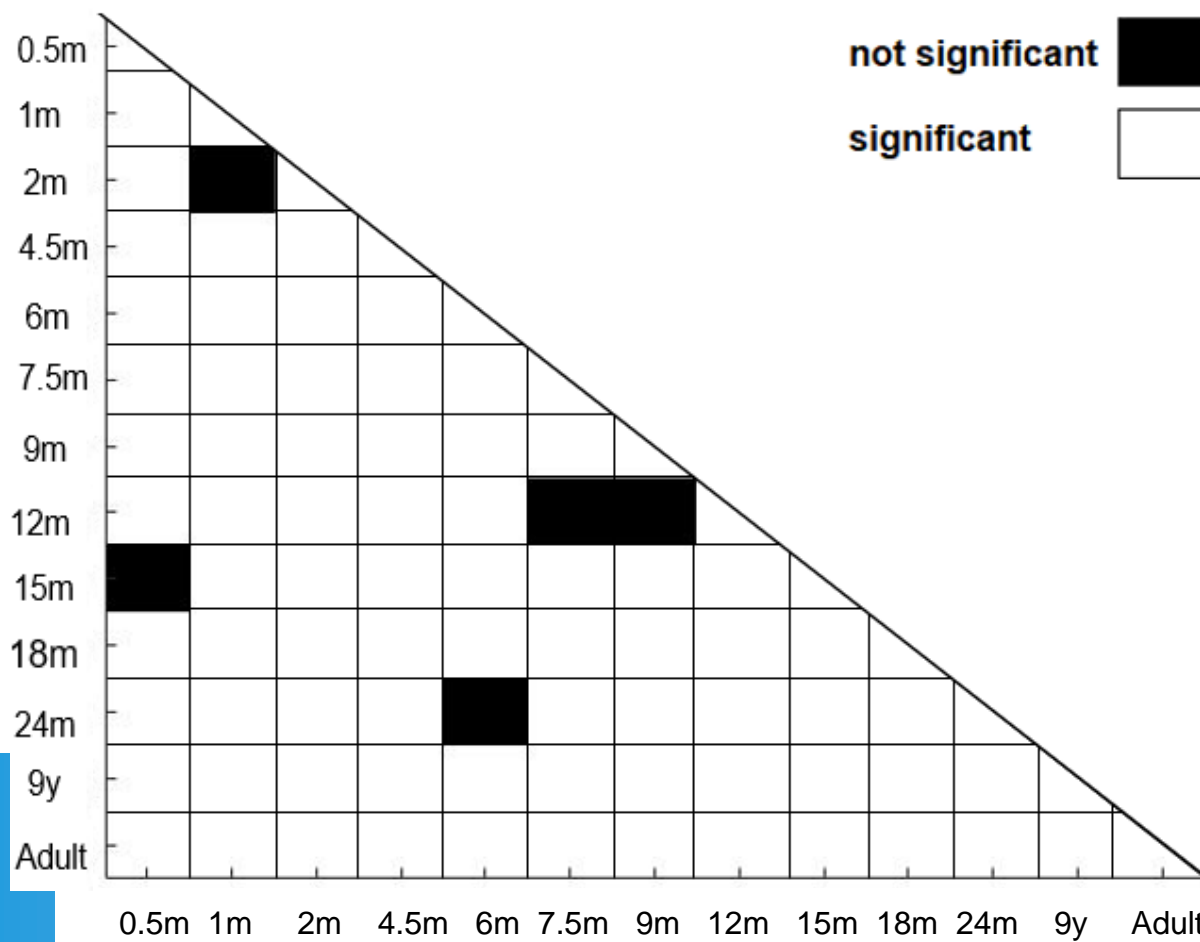

## TP (OPMa-mSQUID (Standard))

| Source  | SS      | df     | MS      | F      | Prob>F |
|---------|---------|--------|---------|--------|--------|
| Columns | 203.26  | 12     | 16.9385 | 556.41 | 0      |
| Error   | 5936.66 | 195013 | 0.0304  |        |        |
| Total   | 6139.92 | 195025 |         |        |        |

## Multi compare

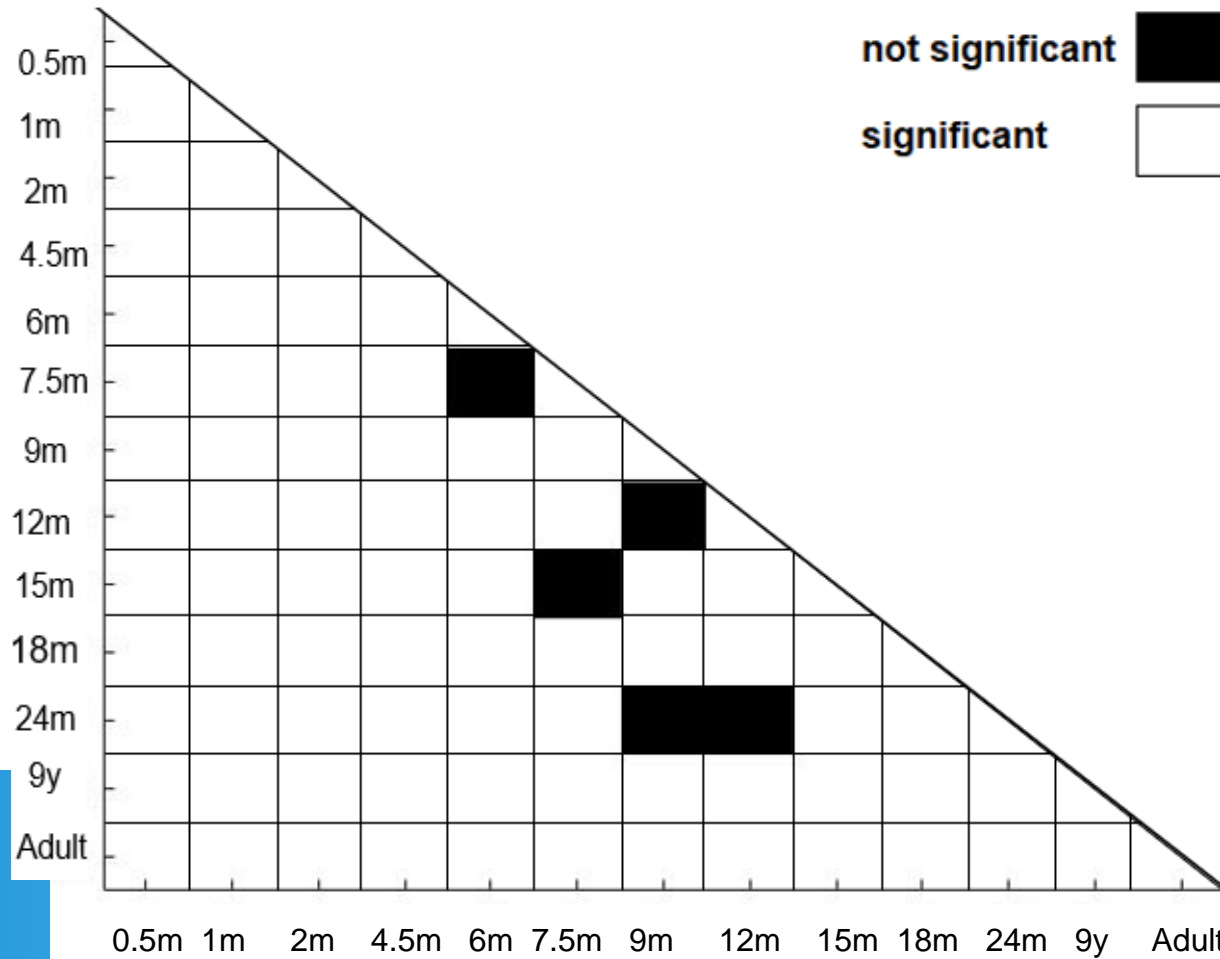

## PLE (OPMa-mSQUID(Optimized))

| ANOVA Table |         |        |         |       |              |
|-------------|---------|--------|---------|-------|--------------|
| Source      | SS      | df     | MS      | F     | Prob>F       |
| Columns     | 191.9   | 12     | 15.9922 | 60.63 | 1.04464e-147 |
| Error       | 51434.7 | 195013 | 0.2638  |       |              |
| Total       | 51626.6 | 195025 |         |       |              |

## Multi compare

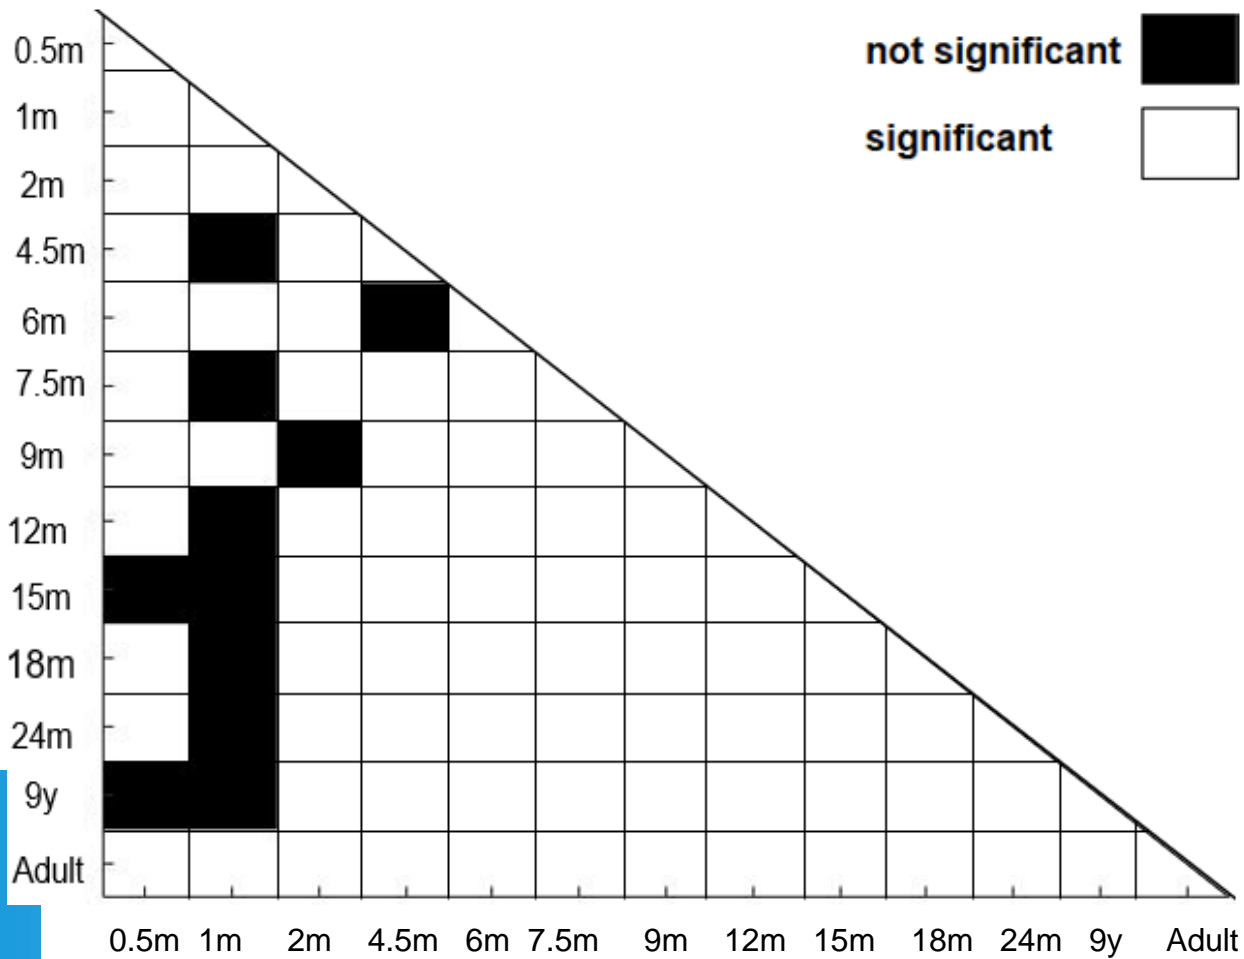



## PLE (OPMa-mSQUID (Standard))

| ANOVA Table |         |        |         |       |             |
|-------------|---------|--------|---------|-------|-------------|
| Source      | SS      | df     | MS      | F     | Prob>F      |
| Columns     | 161.5   | 12     | 13.4576 | 35.24 | 6.70188e-83 |
| Error       | 74473.6 | 195013 | 0.3819  |       |             |
| Total       | 74635.1 | 195025 |         |       |             |

## Multi compare

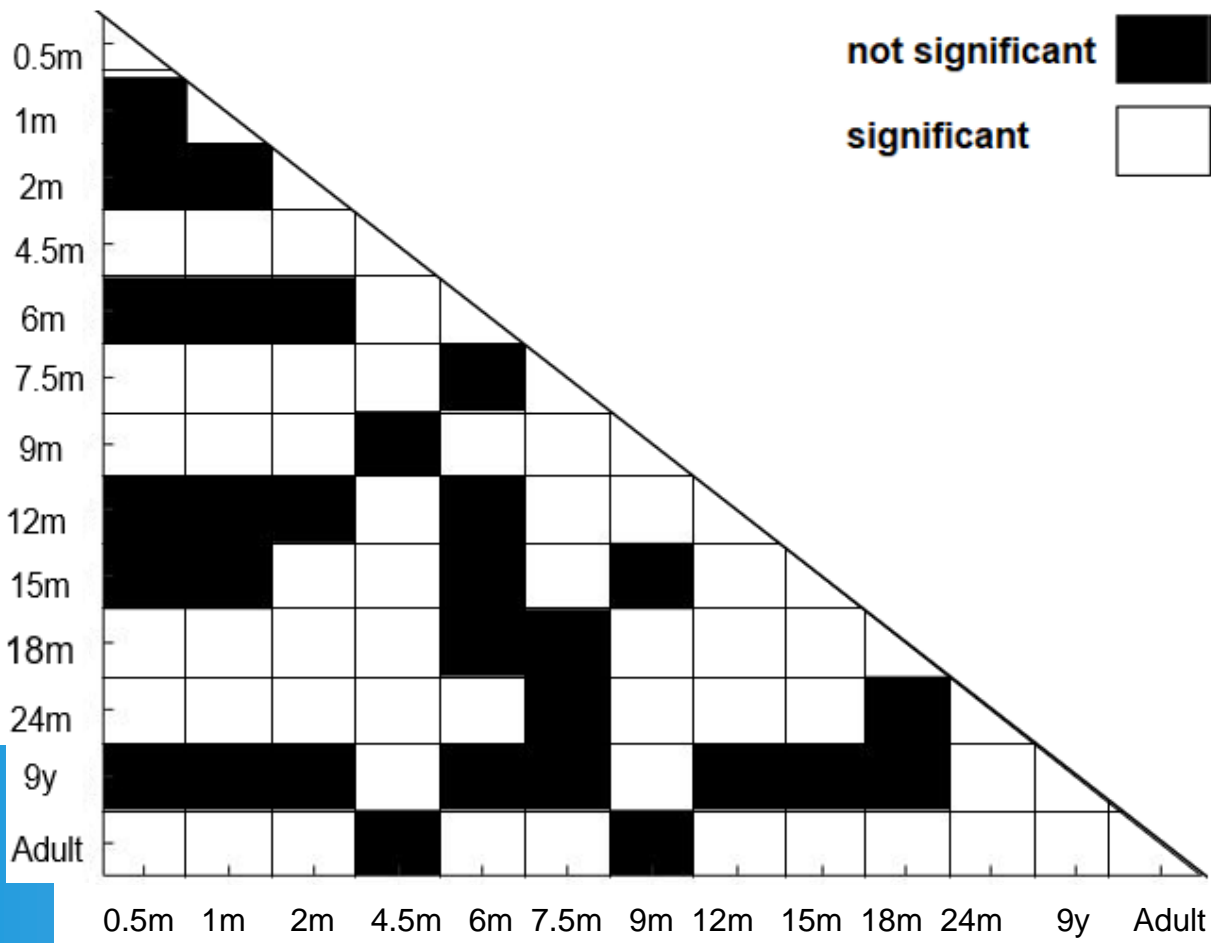

## SD (OPMa-mSQUID (Optimized))

| ANOVA Table |         |        |         |        |        |
|-------------|---------|--------|---------|--------|--------|
| Source      | SS      | df     | MS      | F      | Prob>F |
| Columns     | 918.5   | 12     | 76.5434 | 660.25 | 0      |
| Error       | 22608.1 | 195013 | 0.1159  |        |        |
| Total       | 23526.6 | 195025 |         |        |        |

### Multi compare

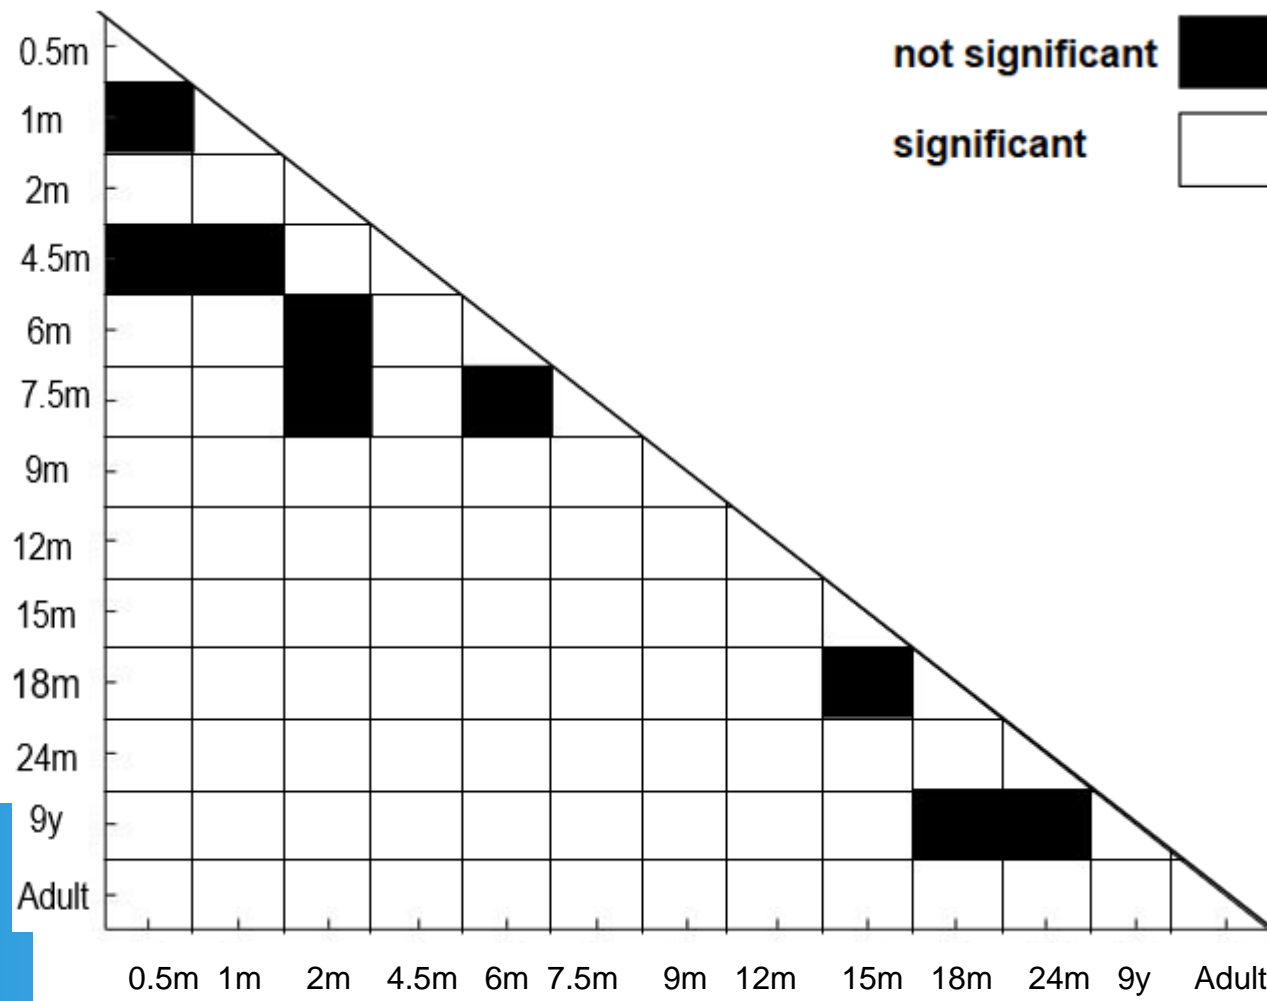

## SD (OPMa-mSQUID(Standard))

| ANOVA Table |         |        |         |        |        |
|-------------|---------|--------|---------|--------|--------|
| Source      | SS      | df     | MS      | F      | Prob>F |
| Columns     | 952.2   | 12     | 79.3502 | 263.57 | 0      |
| Error       | 58710   | 195013 | 0.3011  |        |        |
| Total       | 59662.2 | 195025 |         |        |        |

### Multi compare

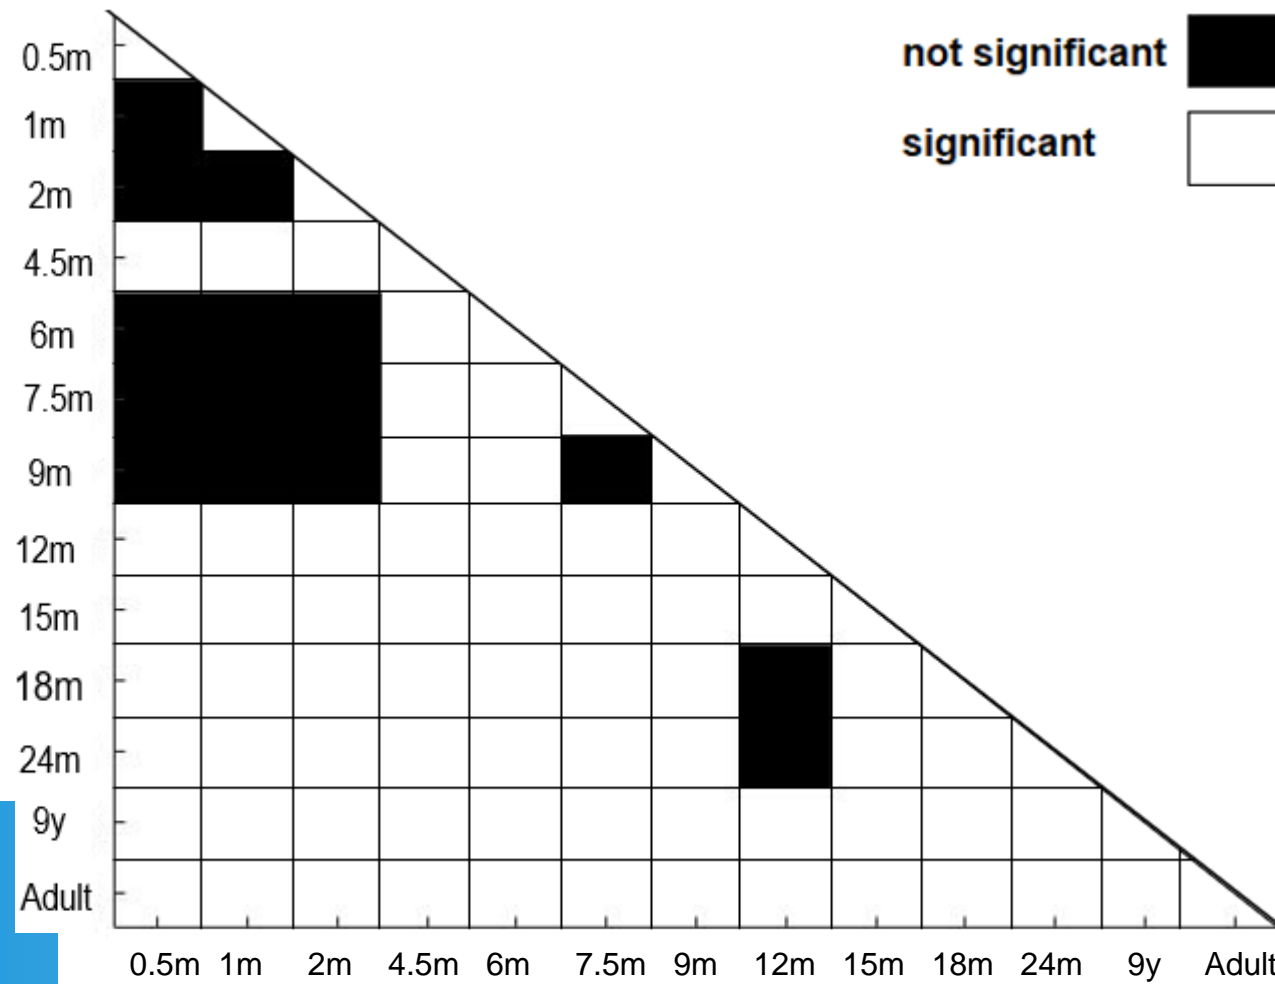

Supplement: s1 [file s1]
